# Supplementary material for: Toward snowpack runoff decision support
Source: PubMed Central journal article supplement (PMC9051623; doi:10.1016/j.isci.2022.104240), 2022-04-12
Supplement: mmc1.pdf [file mmc1.pdf]

**iScience, Volume 25**

**Supplemental information**

**Toward snowpack runoff decision support**

**Anne Heggli, Benjamin Hatchett, Andrew Schwartz, Tim Bardsley, and Emily Hand**

# Supplemental Information

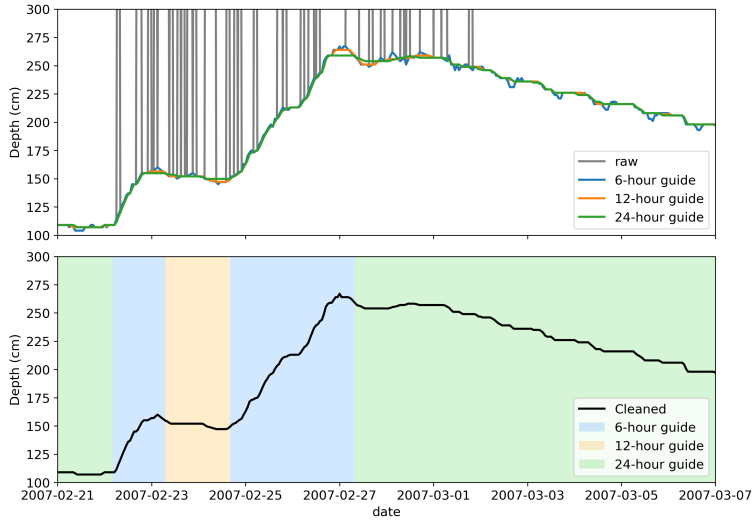

**Figure 1: An example of semi-automated cleaning process and results.** Raw data represented with grey shows the full-scale readings that occur during snowfall events. The 6-hr guide (blue) removes full-scale readings but experiences diurnal flutter, the 12-hr guide (orange) and the 24-hr guide help reduce diurnal flutter or other sensor noise. Related to STAR Methods

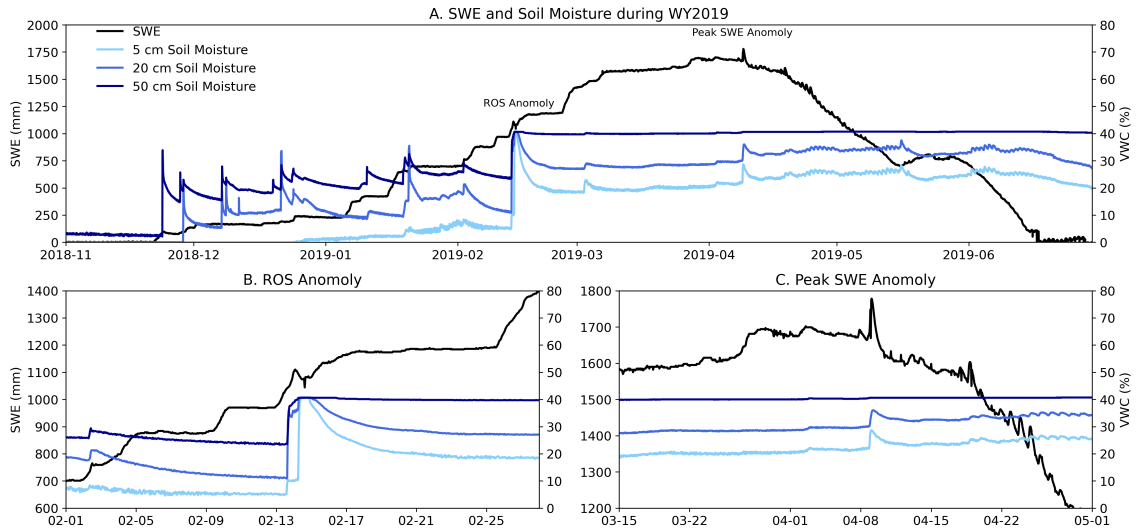

**Figure 2: An example of SWE data anomalies and the value of soil moisture data for intersensor comparison.** (A) SWE data (black) compared with soil moisture at 5 cm (blue), 20 cm (orange), and 50 cm (green). (B) Rapid increase and decrease of SWE during rainfall event is validated by a rapid increase in soil moisture. (C) A jump in SWE observations corresponds with increase of soil moisture. Related to STAR Methods

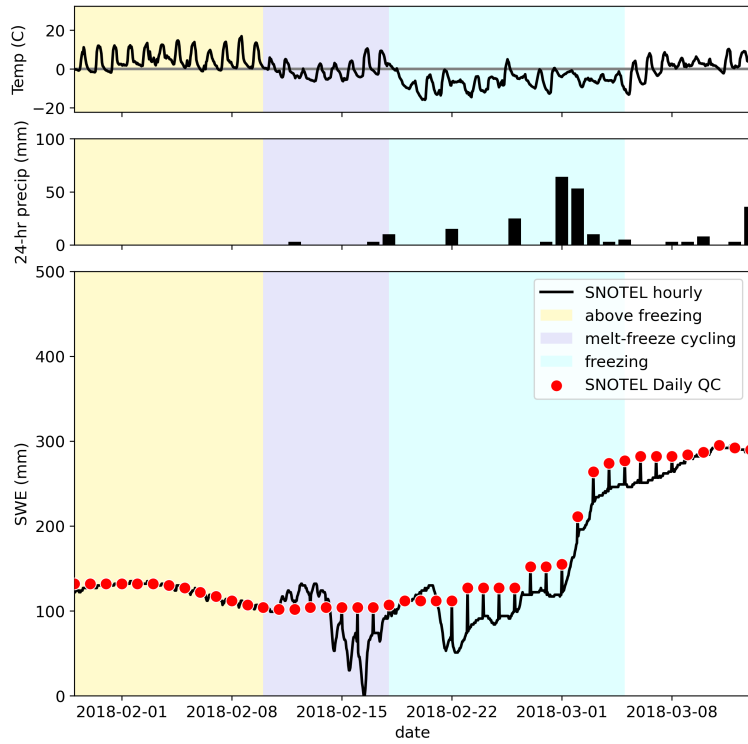

**Figure 3: An example of bridging over a snow pillow.** An extended period of above-freezing days (yellow) followed by melt-freeze cycles (purple) and sub-freezing temperatures (blue) can cause the formation of complex crust layers that inhibit the transfer of weight to the pillow. The erratic readings from the pillow being during the melt-freeze cycle and persist through the sub-freezing which. There is no significant precipitation to justify the change in SWE and therefore this data should be classified as poor quality. Related to STAR Methods

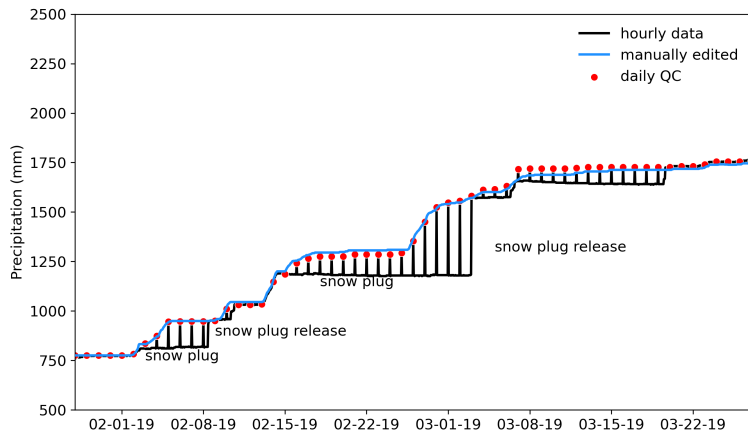

**Figure 4: Example of cleaned precipitation data product after snow plug formation.** SNOTEL hourly data (black), reviewed SNOTEL daily data (red), cleaned hourly data using the methods outlined in the paper (blue). Related to STAR Methods

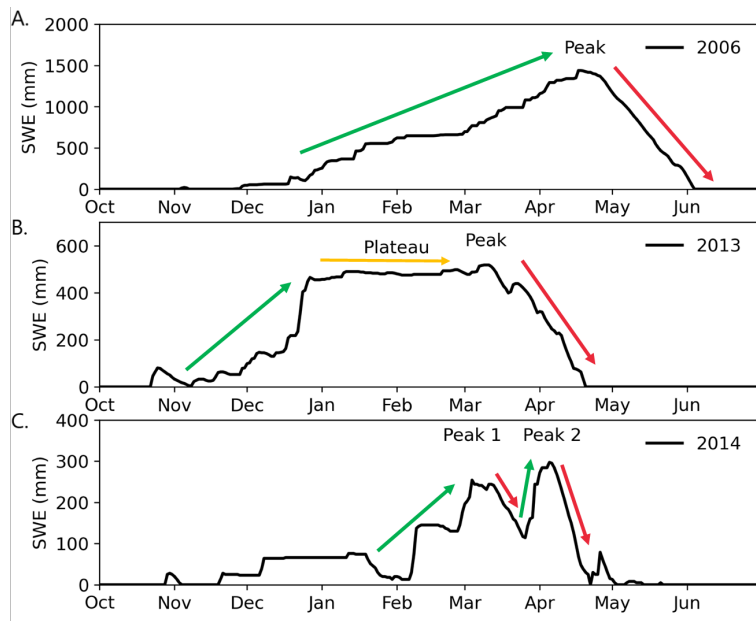

**Figure 5: Example of the types of SWE accumulation patterns.** Possible SWE accumulation (green) and ablation (red) scenarios. (A) steady accumulation leading to a defined peak prior to ablation period, (B) accumulation with prominent plateau (yellow) prior to ablation, and (C) two peaks with two ablation period melts. Related to STAR Methods
